# Supplementary material
Source: PubMed Central journal article supplement (PMC9433108)
Supplement: NIHMS1807256-supplement-Supplemental_Table_1.pdf [file NIHMS1807256-supplement-Supplemental_Table_1.pdf]

**Supplemental Table 1 Brain regions infected by the polysynaptic tracing virus**

– Related to Figures 5 and 7

| Figure 5E. Stomach:: AAV2-retro-hSyn.HI.eGFP-Cre/DRG:: H129 CAG-LSL-TK-tdTomato  |                                                                                                                                                                                                                  |                          |
|----------------------------------------------------------------------------------|------------------------------------------------------------------------------------------------------------------------------------------------------------------------------------------------------------------|--------------------------|
| Day2                                                                             | Left DRG (Dorsal Root Ganglia):T6-T9<br>Right DRG:T7-T9                                                                                                                                                          |                          |
| Day3                                                                             | Spinal T6-T9 lamina X                                                                                                                                                                                            |                          |
| Day4                                                                             | NTS (Nucleus of the Solitary Tract)<br>DMV (Dorsal Motor nucleus of the Vagus)<br>LRN (Lateral Reticular Nucleus)<br>GiV (Gigantocellular reticular nucleus, Ventral part)<br>PMn (Paramedian reticular nucleus) |                          |
| Day5                                                                             | SubC (Subcoeruleus nucleus)<br>PCRtA (Parvicellular Reticular nucleus, $\alpha$ part)<br>MV (Medium Vestublar)<br>rVRG (rostral Ventral Respiratory Group)                                                       |                          |
| Day6                                                                             | LH (Lateral Hypothalamus)<br>PVH (Paraventricular nucleus of Hypothalamus)<br>PSTn (Parasubthalamic nucleus of Hypothalamus)<br>Lat (Lateral/dentate cerebellar nucleus)<br>Mo5 (Trigeminal motor nucleus)       |                          |
| Day7                                                                             | S1HL (Somatosensory Cortex of the Hindlimb)<br>Sim (Cerebellar Simple lobule)                                                                                                                                    |                          |
| Figure 5F. Arm:: H129 CMV-EGFP /nNOS-Cre-Stomach:: H129 CAG-LSL-TK-tdTomato /VGx |                                                                                                                                                                                                                  |                          |
| Day3                                                                             | LRN<br>MdV (Medullary reticular formation Ventral part)<br>GiV<br>PMn                                                                                                                                            | DMV<br>LRN<br>MdV<br>PMn |
| Day4                                                                             | IRt (Intermediate Reticular nucleus)<br>PCRtA<br>Gi (Gigantocellular reticular nucleus)                                                                                                                          | SubC<br>PCRtA<br>rVRG    |
| Day5                                                                             | SpVe (Spinal vestibular nucleus)<br>Int (Interposed Cerebellar nucleus)<br>RtTg (Reticulotegmental nucleus of the pons)                                                                                          | PSTn<br>Mo5<br>Lat       |
| Figure S5K. Stomach:: AAV2-retro-hSyn.HI.eGFP-Cre /NG::H129 CAG-LSL-TK-tdTomato  |                                                                                                                                                                                                                  |                          |
| Day3                                                                             | NTS<br>AP<br>DMV<br>LRN                                                                                                                                                                                          |                          |
| Day4                                                                             | PBN<br>PVH<br>PSTn                                                                                                                                                                                               |                          |

| Figure S5L. Ileum::AAV2-retro-hSyn.HI.eGFP-Cre /NG:: H129 CAG-LSL-TK-tdTomato |                                                                           |
|-------------------------------------------------------------------------------|---------------------------------------------------------------------------|
| Day3                                                                          | NTS<br>LRN                                                                |
| Figure S5M. NOS1 <sup>Cre</sup> -Stomach:: H129 CAG-LSL-TK-tdTomato           |                                                                           |
| Day2                                                                          | Left DRG:T6-T9<br>Right DRG:T7-T9<br>Left NG (Nodose Ganglia)<br>Right NG |
| Day3                                                                          | NTS<br>AP<br>DMV<br>LRN<br>GiV<br>PMn                                     |
| Day4                                                                          | SubC<br>PBN<br>PCRtA<br>rVRG<br>MV                                        |
| Day5                                                                          | PSTn<br>Mo5<br>Lat<br>CeA<br>PVH<br>LH                                    |
| Figure S5N. Glp1r-ires-Cre-Ileum:: H129 CAG-LSL-TK-tdTomato                   |                                                                           |
| Day2                                                                          | Left DRG:L1-L2<br>Right DRG:L2<br>Left NG<br>Right NG                     |
| Day3                                                                          | Spinal L1-L2 lamina X<br>LRN<br>NTS                                       |
| Day4                                                                          | PMn<br>DMV<br>SubC                                                        |
| Day5                                                                          | PSTn                                                                      |
| Figure S5O. Ileum:: H129 CMV-EGFP / VGx                                       |                                                                           |
| Day3                                                                          | LRN                                                                       |
| Day4                                                                          | DMV                                                                       |

**Figure 7A and S7E. Vglut2-ires-Cre-PSTn:: PRV CAG-DIO-TK--GFP Ba-2017**

|      |                                                                                                                                                                                                                                                                         |
|------|-------------------------------------------------------------------------------------------------------------------------------------------------------------------------------------------------------------------------------------------------------------------------|
| Day2 | S1J (Primary somatosensory cortex, Jaw area)<br>AIC (Agranular Insular Cortex)<br>M2 (secondary Motor)<br>ACC (Anterior Cingulate Cortices)<br>IC (Insular Cortex)<br>CeA (Central nucleus of the Amygdala)<br>BnST (Bed nucleus of the Stria Terminalis)<br>PBN<br>PVH |
| Day3 | NTS<br>Sp5 (Spinal Trigeminal nucleus)<br>SC (Superior Colliculus)<br>DR (Dorsal Raphe)<br>SNc (Substantia Nigra pars compacta)<br>VTA (Ventral Tegmental Area)<br>LC (Locus Coeruleus)<br>PCRtA                                                                        |
| Day4 | LRN<br>DMV<br>Spinal T5-L3 lamina X<br>Bar (Barrington's nucleus)<br>TG (Trigeminal Ganglia)<br>GG (Geniculate Ganglia)<br>NG (Nodose Ganglia)                                                                                                                          |
| Day5 | DRG: T5-L3<br>Taste buds                                                                                                                                                                                                                                                |
| Day6 | Stomach<br>Ileum                                                                                                                                                                                                                                                        |
| Day7 | CG (Celiac Ganglia)                                                                                                                                                                                                                                                     |

**Figure 7Z. B6 Masseter/Digastric/Glossus/Parotid::PRV-CMV-EGFP Ba-152**

|      | Massater                                                                       | Digastric                       | Glossus                                       | Parotid                                                                                          |
|------|--------------------------------------------------------------------------------|---------------------------------|-----------------------------------------------|--------------------------------------------------------------------------------------------------|
| Day2 | Mo5                                                                            | Mo5                             | 12N (Hypoglossal nucleus)                     | IS (Inferior Salivatory nucleus)                                                                 |
| Day3 | Su5 (Supratrigeminal nucleus)<br>PCRt<br>IRt<br>Gi<br>Sp5<br>LC<br>SubC<br>PBN | Su5<br>PCRt<br>PBN<br>Sp5<br>Gi | DMV<br>Gi<br>IRt<br>PCRt<br>PBN<br>LC<br>SubC | SuS (Superior salivatory nucleus)<br>NTS<br>Sp5<br>Gi<br>DMV<br>IRt<br>PCRt<br>PBN<br>LC<br>SubC |
| Day4 | CeA<br>PSTn<br>LH<br>PVH<br>DM (Dorsomedial hypothalamic nucleus)              | CeA<br>PSTn<br>LH<br>PAG<br>PVH | PSTn<br>LH<br>PVH                             | PAG<br>CeA<br>PSTn<br>PVH                                                                        |
